# Risk of Type 2 Diabetes and Obesity Is Differentially Associated with Variation in *FTO* in Whites and African-Americans in the ARIC Study

Jan Bressler<sup>1</sup>, W. H. Linda Kao<sup>2</sup>, James S. Pankow<sup>3</sup>, Eric Boerwinkle<sup>1,4\*</sup>

**1** Human Genetics Center, University of Texas Health Science Center at Houston, Houston, Texas, United States of America, **2** Department of Epidemiology, Johns Hopkins Bloomberg School of Public Health, Baltimore, Maryland, United States of America, **3** Division of Epidemiology and Community Health, School of Public Health, University of Minnesota, Minneapolis, Minnesota, United States of America, **4** Brown Foundation Institute of Molecular Medicine, University of Texas Health Science Center at Houston, Houston, Texas, United States of America

## Abstract

Single nucleotide polymorphisms (SNPs) in the fat mass and obesity associated (*FTO*) gene are associated with body mass index (BMI) in populations of European descent. The *FTO* rs9939609 variant, first detected in a genome-wide association study of diabetes, conferred an increased disease risk that was abolished after adjustment for BMI, suggesting that the association may be due to variation in adiposity. The relationship between diabetes, four previously identified *FTO* polymorphisms that span a 19.6-kb genomic region, and obesity was therefore evaluated in the biracial population-based Atherosclerosis Risk in Communities Study with the goal of further refining the association by comparing results between the two ethnic groups. The prevalence of diabetes and obesity ( $\text{BMI} \geq 30 \text{ kg/m}^2$ ) was established at baseline, and diabetes was determined by either self-report, a fasting glucose level  $\geq 126 \text{ mg/dL}$ , or non-fasting glucose  $\geq 200 \text{ mg/dL}$ . There were 1,004 diabetes cases and 10,038 non-cases in whites, and 670 cases and 2,780 non-cases in African-Americans. Differences in mean BMI were assessed by a general linear model, and multivariable logistic regression was used to predict the risk of diabetes and obesity. For white participants, the *FTO* rs9939609 A allele was associated with an increased risk of diabetes (odds ratio (OR) = 1.19,  $p < 0.001$ ) and obesity (OR = 1.22,  $p < 0.001$ ) under an additive genetic model that was similar for all of the SNPs analyzed. In African-Americans, only the rs1421085 C allele was a determinant of obesity risk (OR = 1.17,  $p = 0.05$ ), but was found to be protective against diabetes (OR = 0.79,  $p = 0.03$ ). Adjustment for BMI did not eliminate any of the observed associations with diabetes. Significant statistical interaction between race and the *FTO* variants suggests that the effect on diabetes susceptibility may be context dependent.

**Citation:** Bressler J, Kao WH, Pankow JS, Boerwinkle E (2010) Risk of Type 2 Diabetes and Obesity Is Differentially Associated with Variation in *FTO* in Whites and African-Americans in the ARIC Study. PLoS ONE 5(5): e10521. doi:10.1371/journal.pone.0010521

**Editor:** Adrian Vella, Mayo Clinic College of Medicine, United States of America

**Received:** December 13, 2009; **Accepted:** April 9, 2010; **Published:** May 20, 2010

**Copyright:** © 2010 Bressler et al. This is an open-access article distributed under the terms of the Creative Commons Attribution License, which permits unrestricted use, distribution, and reproduction in any medium, provided the original author and source are credited.

**Funding:** The Atherosclerosis Risk in Communities Study is carried out as a collaborative study supported by National Heart, Lung, and Blood Institute contracts N01-HC-55015, N01-HC-55016, N01-HC-55018, N01-HC-55019, N01-HC-55020, N01-HC-55021, and N01-HC-55022. The funders had no role in study design, data collection and analysis, decision to publish, or preparation of the manuscript.

**Competing Interests:** The authors have declared that no competing interests exist.

\* E-mail: Eric.Boerwinkle@uth.tmc.edu

## Introduction

Diabetes is an important risk factor for cardiovascular disease [1]. Obesity is an independent risk factor for diabetes [2] and either BMI or waist-to-hip ratio (WHR) has been commonly used as a surrogate measure of adiposity. From a public health perspective, obesity is an accessible target for intervention programs designed to reduce the incidence of diabetes [3].

The fat mass and obesity associated (*FTO*) gene maps to chromosome 16q12.2 and includes nine predicted exons (Genbank NM 00108432). Genetic variants in *FTO* have been reported to be associated with BMI in study populations of European descent [4,5,6,7,8], although functional polymorphisms in this gene have not yet been identified. Frayling et al. identified the *FTO* rs9939609 SNP in a genome-wide association study comparing 1,924 British type 2 diabetes cases with 2,938 controls [7]. The minor A allele was found to be strongly associated with diabetes, while adjustment for BMI in a replication sample abolished the association with diabetes. *FTO* is ubiquitously expressed in human

tissues [6,7], with a high level found in the hypothalamus indicating a possible role in the regulation of appetite or energy balance. In accordance with this hypothesis, introduction of a *Fto* null mutation in mice resulted in postnatal growth retardation, loss of white adipose tissue, and increased energy expenditure [9]. The ability of murine *Fto* to catalyze the demethylation of 3-methylthymine in single-stranded DNA has also recently been reported [10]. Although a relationship between *FTO* polymorphisms and obesity has been found in African-American children [11], there was no association between *FTO* variants and either diabetes or obesity in a study of postmenopausal women [12], and there have been inconsistent results for African-American adults in three other family-based studies [8,13,14]. To date there have been no investigations of the association between *FTO* variants and diabetes or obesity in a community-based study that included both African-American men and women.

In this study, the relationship between diabetes, four previously reported *FTO* SNPs [6,7,15], and obesity was examined in African-American and white individuals enrolled in the large prospective

Atherosclerosis Risk in Communities (ARIC) study [16]. Only one of the genetic variants (rs1421085) was associated with both diabetes and obesity in African-Americans, while all of the *FTO* polymorphisms were determinants of disease risk in whites as shown in other studies [4,5,6,7,8,15]. This may reflect differences in linkage disequilibrium (LD) between the genetic variants in populations of European and African ancestry [17], as well as the effects of other as yet uncharacterized gene-gene or gene-environment interactions that may be distinctive for each racial group.

## Results

A description of the study sample stratified by diabetes status and race is shown in Tables 1 and 2. The values for all clinical characteristics differed significantly between cases and non-cases for both whites and African-Americans, except there was a

significantly greater frequency of males in the group of white diabetes cases when compared to those without diabetes while there was no relationship between gender and case status for African-Americans.

The allele and genotype frequencies for all of the *FTO* polymorphisms were in accordance with Hardy-Weinberg equilibrium expectations for both African-American and white individuals ( $p < 0.05$ ). There was a significant difference in the four *FTO* genotype frequencies between diabetes cases and non-cases found for whites, but a difference was only revealed for rs1421085 in African-Americans with the frequency of the minor allele higher in non-cases than in cases. Similarly, when the frequency of all possible two-, three-, and four-marker haplotypes was compared between diabetes cases and non-cases, significant differences were shown for all of the haplotypes in whites but for none of the marker combinations in African-Americans (Table S1).

**Table 1.** Clinical characteristics and *FTO* SNP genotype frequencies in African-Americans stratified by diabetes case status.

| Characteristics          |                 | Diabetes (n = 670)         |      | Non-Cases (n = 2,780)     |      | p       |
|--------------------------|-----------------|----------------------------|------|---------------------------|------|---------|
| Age, years               |                 | 55.3 (5.6) <sup>a</sup>    |      | 53.1 (5.8) <sup>a</sup>   |      | <0.001  |
| Male (%)                 |                 | 35.7                       |      | 38.7                      |      | 0.147*  |
| European ancestry (%)    |                 | 16.7                       |      | 18.1                      |      | 0.002   |
| BMI (kg/m <sup>2</sup> ) |                 | 32.0 (6.1) <sup>a</sup>    |      | 29.0 (6.0) <sup>a</sup>   |      | <0.001  |
| DBP, mm Hg               |                 | 78.3 (12.0) <sup>a</sup>   |      | 80.0 (12.2) <sup>a</sup>  |      | <0.001  |
| SBP, mm Hg               |                 | 133.3 (22.9) <sup>a</sup>  |      | 127.7 (20.8) <sup>a</sup> |      | <0.001  |
| HDL, mg/dL               |                 | 48.8 (15.0) <sup>a</sup>   |      | 56.3 (17.8) <sup>a</sup>  |      | <0.001  |
| LDL, mg/dL               |                 | 143.6 (45.0) <sup>a</sup>  |      | 135.9 (42.0) <sup>a</sup> |      | <0.001  |
| Glucose, mg/dL           |                 | 199.7 (89.9) <sup>a</sup>  |      | 98.7 (10.1) <sup>a</sup>  |      | <0.001  |
| Insulin, pmol/L          |                 | 342.8 (632.4) <sup>a</sup> |      | 94.8 (69.9) <sup>a</sup>  |      | <0.001  |
| <i>FTO</i> SNP           | Genotype/Allele | n                          | %    | n                         | %    | p       |
| rs9939609                | TT              | 197                        | 30.1 | 734                       | 27.3 | 0.364 * |
|                          | AT              | 310                        | 47.3 | 1,309                     | 48.8 |         |
|                          | AA              | 48                         | 22.6 | 642                       | 23.9 |         |
|                          | T               | 704                        | 53.7 | 2,777                     | 51.7 |         |
|                          | A               | 606                        | 46.3 | 2,593                     | 48.3 |         |
| rs17817449               | TT              | 258                        | 39.5 | 996                       | 36.9 | 0.413*  |
|                          | GT              | 299                        | 45.8 | 1,270                     | 47.0 |         |
|                          | GG              | 96                         | 14.7 | 434                       | 16.1 |         |
|                          | T               | 815                        | 62.4 | 3,262                     | 60.4 |         |
|                          | G               | 491                        | 37.6 | 2,138                     | 39.6 |         |
| rs805136                 | CC              | 225                        | 34.2 | 861                       | 31.6 | 0.403*  |
|                          | AC              | 306                        | 46.6 | 1,334                     | 48.9 |         |
|                          | AA              | 126                        | 19.2 | 533                       | 19.5 |         |
|                          | C               | 756                        | 57.5 | 3,056                     | 56.0 |         |
|                          | A               | 558                        | 42.5 | 2,400                     | 44.0 |         |
| rs1421085                | TT              | 551                        | 83.9 | 2,153                     | 79.0 | 0.014*  |
|                          | CT              | 101                        | 15.4 | 531                       | 19.5 |         |
|                          | CC              | 5                          | 0.8  | 41                        | 1.5  |         |
|                          | T               | 1,203                      | 91.6 | 4,837                     | 88.8 |         |
|                          | C               | 111                        | 8.4  | 613                       | 11.2 |         |

n, number; p, p-value, significance of difference between group means determined by t-test; BMI, body mass index; DBP, diastolic blood pressure; HDL, high density lipoprotein; LDL, low density lipoprotein;

<sup>a</sup>mean and standard deviation; SNP, single nucleotide polymorphism;

\*p-value Pearson chi-squared.

doi:10.1371/journal.pone.0010521.t001

**Table 2.** Clinical characteristics and *FTO* SNP genotype frequencies in whites stratified by diabetes case status.

| Characteristics          |                 | Diabetes (n = 1,004)       |      | Non-Cases (n = 10,038)    |      | p       |
|--------------------------|-----------------|----------------------------|------|---------------------------|------|---------|
| Age, years               |                 | 56.2 (5.6) <sup>a</sup>    |      | 54.2 (5.7) <sup>a</sup>   |      | <0.001  |
| Male (%)                 |                 | 53.0                       |      | 46.6                      |      | <0.001* |
| BMI (kg/m <sup>2</sup> ) |                 | 30.4 (5.7) <sup>a</sup>    |      | 26.7 (4.6) <sup>a</sup>   |      | <0.001  |
| DBP, mm Hg               |                 | 72.9 (10.9) <sup>a</sup>   |      | 71.4 (10.0) <sup>a</sup>  |      | <0.001  |
| SBP, mm Hg               |                 | 126.8 (18.4) <sup>a</sup>  |      | 117.6 (16.6) <sup>a</sup> |      | <0.001  |
| HDL, mg/dL               |                 | 41.4 (13.9) <sup>a</sup>   |      | 51.4 (16.8) <sup>a</sup>  |      | <0.001  |
| LDL, mg/dL               |                 | 140.1 (39.2) <sup>a</sup>  |      | 137.3 (37.7) <sup>a</sup> |      | 0.032   |
| Glucose, mg/dL           |                 | 174.7 (70.6) <sup>a</sup>  |      | 98.6 (9.0) <sup>a</sup>   |      | <0.001  |
| Insulin, pmol/L          |                 | 222.7 (433.6) <sup>a</sup> |      | 72.6 (54.3) <sup>a</sup>  |      | <0.001  |
| <i>FTO</i> SNP           | Genotype/Allele | n                          | %    | n                         | %    | p       |
| rs9939609                | TT              | 314                        | 31.8 | 3,566                     | 36.0 | 0.001*  |
|                          | AT              | 472                        | 47.8 | 4,739                     | 47.8 |         |
|                          | AA              | 202                        | 20.4 | 1,610                     | 16.2 |         |
|                          | T               | 1,100                      | 55.7 | 11,871                    | 59.9 |         |
| rs17817449               | A               | 876                        | 44.3 | 7,959                     | 40.1 | 0.002*  |
|                          | TT              | 312                        | 31.6 | 3,565                     | 35.8 |         |
|                          | GT              | 474                        | 48.1 | 4,752                     | 47.8 |         |
|                          | GG              | 200                        | 20.3 | 1,631                     | 16.4 |         |
| rs805136                 | T               | 1,098                      | 55.7 | 11,882                    | 59.7 | 0.001*  |
|                          | G               | 874                        | 44.3 | 8,014                     | 40.3 |         |
|                          | CC              | 311                        | 31.6 | 3,545                     | 35.9 |         |
|                          | AC              | 473                        | 48.1 | 4,714                     | 47.8 |         |
| rs1421085                | AA              | 200                        | 20.3 | 1,614                     | 16.3 | 0.001*  |
|                          | C               | 1,095                      | 55.6 | 11,804                    | 59.8 |         |
|                          | A               | 873                        | 44.4 | 7,942                     | 40.2 |         |
|                          | TT              | 304                        | 30.8 | 3,461                     | 35.0 |         |
| rs1421085                | CT              | 477                        | 48.2 | 4,759                     | 48.1 | 0.001*  |
|                          | CC              | 208                        | 21.0 | 1,673                     | 16.9 |         |
|                          | T               | 1,085                      | 54.8 | 11,681                    | 59.0 |         |
|                          | C               | 893                        | 45.2 | 8,105                     | 41.0 |         |

n, number; p, p-value, significance of difference between group means determined by t-test; BMI, body mass index; DBP, diastolic blood pressure; SBP, systolic blood pressure; HDL, high density lipoprotein; LDL, low density lipoprotein;

<sup>a</sup>mean and standard deviation; SNP, single nucleotide polymorphism;

\*p-value Pearson chi-squared.

doi:10.1371/journal.pone.0010521.t002

A general linear model was used to determine whether there was significant variation in mean BMI between those with different *FTO* genotypes (Table 3). There was a significant difference found for white participants for all polymorphisms studied but only for rs17817449 and rs1421085 in African-Americans, although the trend in both racial groups was for increasing BMI with each addition of an *FTO* risk allele. There was also a significant difference found in mean WHR and waist circumference (WC) for white but not for African-American individuals categorized by *FTO* genotype, while there was no apparent variation in mean height with genotype for either racial group. Sex-specific analyses were carried out (data not shown) and variation in the effect of the *FTO* SNPs on obesity-related quantitative traits by gender was not observed with the exception of higher mean BMI found for African-American females ( $p = 0.02$ ) but not for males ( $p = 0.55$ ) with addition of a rs1421085 C allele.

BMI was also evaluated as a categorical variable using standard criteria [18] (Table 4). When a BMI  $\geq 30$  kg/m<sup>2</sup> was used to

define obesity and logistic regression models were adjusted for age and gender, addition of an *FTO* rs1421085 C allele conferred an elevated risk of being obese for both white and African-American participants. The remaining 3 *FTO* polymorphisms were significantly associated with obesity in whites but not in African-Americans. If this association was examined separately by gender, the risk of obesity was similar for both sexes for white participants for all of the polymorphisms, while a significantly increased risk of obesity was found for African-American males but not for females for rs9939609 (males, OR = 1.27,  $p = 0.01$ ; females, OR = 1.00,  $p = 0.95$ ) and rs17817449 (males, OR = 1.19,  $p = 0.05$ ; females, OR = 1.06,  $p = 0.36$ ) with evidence for gender by gene interaction for rs9939609 (OR for interaction = 1.27,  $p = 0.03$ ). Application of a polytomous logistic model revealed a significant association between the 4 *FTO* genetic variants and BMI across all categories for white participants when compared to individuals whose BMI was  $< 25$  kg/m<sup>2</sup>, while this pattern was not observed for African-American subjects.

**Table 3.** Association of *FTO* genotype and quantitative traits stratified by race.

| SNP        | Genotype | BMI (AA)                | p*     | WHR (AA)      | p*     | Waist (AA)   | p*     | Height (AA) | p*   |
|------------|----------|-------------------------|--------|---------------|--------|--------------|--------|-------------|------|
| rs9939609  | TT       | 29.4 (6.2) <sup>a</sup> | 0.22   | 0.918 (0.076) | 0.82   | 98.7 (15.2)  | 0.27   | 167.9 (9.2) | 0.63 |
|            | AT       | 29.6 (6.2)              |        | 0.919 (0.075) |        | 99.1 (15.3)  |        | 168.2 (8.9) |      |
|            | AA       | 29.8 (5.9)              |        | 0.919 (0.076) |        | 99.5 (14.8)  |        | 168.2 (8.8) |      |
| rs17817449 | TT       | 29.4 (6.1)              | 0.05   | 0.918 (0.075) | 0.75   | 98.6 (14.9)  | 0.07   | 167.9 (9.0) | 0.38 |
|            | GT       | 29.5 (6.1)              |        | 0.918 (0.077) |        | 98.9 (15.1)  |        | 168.2 (8.9) |      |
|            | GG       | 30.0 (6.2)              |        | 0.920 (0.073) |        | 100.1 (15.6) |        | 168.4 (8.8) |      |
| rs8050136  | CC       | 29.6 (6.2)              | 0.48   | 0.919 (0.076) | 0.77   | 99.1 (15.2)  | 0.58   | 167.8 (8.9) | 0.59 |
|            | AC       | 29.5 (6.2)              |        | 0.918 (0.076) |        | 98.8 (15.2)  |        | 168.2 (8.9) |      |
|            | AA       | 29.8 (6.0)              |        | 0.919 (0.075) |        | 99.6 (15.0)  |        | 168.2 (8.8) |      |
| rs1421085  | TT       | 29.5 (6.1)              | 0.02   | 0.918 (0.076) | 0.39   | 99.0 (15.0)  | 0.09   | 168.0 (8.9) | 0.48 |
|            | CT       | 29.7 (6.3)              |        | 0.919 (0.074) |        | 99.1 (15.3)  |        | 168.1 (9.0) |      |
|            | CC       | 30.3 (6.7)              |        | 0.926 (0.074) |        | 101.4 (16.0) |        | 170.1 (9.0) |      |
|            |          | BMI (W)                 | p*     | WHR (W)       | p*     | Waist (W)    | p*     | Height (W)  | p*   |
| rs9939609  | TT       | 26.6 (4.6)              | <0.001 | 0.924 (0.079) | <0.001 | 95.2 (12.9)  | <0.001 | 168.7 (9.4) | 0.67 |
|            | AT       | 27.1 (4.9)              |        | 0.929 (0.079) |        | 96.4 (13.4)  |        | 168.5 (9.4) |      |
|            | AA       | 27.5 (5.1)              |        | 0.935 (0.078) |        | 97.7 (13.9)  |        | 168.8 (9.4) |      |
| rs17817449 | TT       | 26.6 (4.6)              | <0.001 | 0.924 (0.080) | <0.001 | 95.2 (13.0)  | <0.001 | 168.7 (9.4) | 0.89 |
|            | GT       | 27.1 (4.9)              |        | 0.929 (0.079) |        | 96.4 (13.5)  |        | 168.5 (9.4) |      |
|            | GG       | 27.5 (5.1)              |        | 0.935 (0.078) |        | 97.6 (13.9)  |        | 168.8 (9.4) |      |
| rs8050136  | CC       | 26.6 (4.6)              | <0.001 | 0.924 (0.080) | <0.001 | 95.2 (13.0)  | <0.001 | 168.7 (9.4) | 0.79 |
|            | AC       | 27.1 (4.9)              |        | 0.929 (0.079) |        | 96.4 (13.5)  |        | 168.5 (9.4) |      |
|            | AA       | 27.5 (5.1)              |        | 0.935 (0.078) |        | 97.7 (13.9)  |        | 168.8 (9.4) |      |
| rs1421085  | TT       | 26.6 (4.6)              | <0.001 | 0.924 (0.79)  | <0.001 | 95.1 (13.0)  | <0.001 | 168.7 (9.4) | 0.75 |
|            | CT       | 27.1 (4.9)              |        | 0.924 (0.79)  |        | 96.5 (13.5)  |        | 168.5 (9.4) |      |
|            | CC       | 27.5 (5.1)              |        | 0.934 (0.078) |        | 97.6 (13.9)  |        | 168.8 (9.4) |      |

SNP, single nucleotide polymorphism; BMI, body mass index; AA, African-American; p, p-value, significance of differences in means of obesity-related quantitative traits among individuals categorized by *FTO* genotype;

\*adjusted for age and gender in white participants, and for age, gender, and percentage European ancestry in African-American participants; WHR, waist-to-hip ratio;

<sup>a</sup>mean and standard deviation; W, white.

doi:10.1371/journal.pone.0010521.t003

Multivariable logistic regression models were used to examine the association of sequence variation in the *FTO* gene and diabetes case status. These results are presented in Table 5. After adjusting for age and gender, all of the *FTO* risk alleles were significantly associated with an increased susceptibility for diabetes in white individuals. Adjustment for age, gender, as well as BMI attenuated but did not abolish the risk for diabetes.

In contrast to the results described above for whites, three of the *FTO* SNPs were not significantly associated with diabetes case status for African-American participants in the ARIC study (Table 5). However, a significant protective effect of the rs142105 C allele was observed that was still evident after adjustment for BMI. When multivariable logistic regression was performed to examine the influence of the *FTO* gene on diabetes risk after combining African-American and white participants and adjusting for age, gender, and race, significant interaction between all of the *FTO* genetic variants and race was detected (p-value for interaction = 0.001, 0.001, 0.002, and <0.001 for rs9939609, rs17817449, rs805136, and rs1421085, respectively).

## Discussion

The relationship between diabetes, four previously identified *FTO* polymorphisms, and obesity was evaluated in the biracial

population-based ARIC cohort study in an initial effort to fine map the association by comparing results between two racial groups. The assumption underlying the performance of these analyses was that since functional SNPs in *FTO* have not yet been identified, the detection of genetic variants that are significantly associated with obesity and diabetes in multiple ethnic or racial groups may help to further define the relevant genomic region or potential candidate causative mutations. In this study, all of the *FTO* polymorphisms were associated with elevated risk for diabetes and obesity in white participants, while addition of the rs1421085 C allele was a determinant of increased susceptibility to obesity in African-Americans but conferred a protective effect against diabetes.

Although Frayling et al. found that the association of the *FTO* gene and diabetes was mediated by BMI in a genome-wide association study of British diabetes cases and controls [7], the results for this cohort suggest that the gene plays a role in the susceptibility to diabetes that cannot entirely be accounted for by its effect on body size. The attenuation but not elimination of risk for diabetes after adjusting for BMI in whites may reflect the fact that a single BMI measurement in prevalent cases may not fully capture the effect of *FTO* on adiposity and metabolism. The protective effect of the rs1421085 C allele was more marked after adjustment for BMI in African-Americans. For both racial groups,

**Table 4.** Association of *FTO* and obesity or BMI stratified by race.

| SNP        | BMI                 | kg/m <sup>2</sup> | AA    | %    | OR   | 95% CI    | p*   | White | %    | OR   | 95% CI    | p*     |
|------------|---------------------|-------------------|-------|------|------|-----------|------|-------|------|------|-----------|--------|
| rs9939609  | Obese ( $\geq 30$ ) |                   | 1,346 | 40.3 | 1.09 | 0.98–1.20 | 0.10 | 2,470 | 22.6 | 1.22 | 1.14–1.30 | <0.001 |
|            | <25                 |                   | 730   | 21.9 | †    |           |      | 4,065 | 37.3 | †    |           |        |
|            | 25–29               |                   | 1,264 | 37.8 | 1.01 | 0.89–1.15 | 0.86 | 4,368 | 40.0 | 1.08 | 1.02–1.15 | 0.02   |
|            | 30–40               |                   | 1,154 | 34.5 | 1.10 | 0.96–1.26 | 0.15 | 2,276 | 20.9 | 1.27 | 1.18–1.37 | <0.001 |
|            | >40                 |                   | 192   | 5.8  | 1.04 | 0.83–1.31 | 0.70 | 194   | 1.8  | 1.23 | 1.00–1.51 | 0.05   |
| rs17817449 | Obese ( $\geq 30$ ) |                   | 1,346 | 40.1 | 1.10 | 1.00–1.22 | 0.06 | 2,473 | 22.6 | 1.20 | 1.13–1.28 | <0.001 |
|            | <25                 |                   | 741   | 22.1 | †    |           |      | 4,087 | 37.4 | †    |           |        |
|            | 25–29               |                   | 1,266 | 37.8 | 0.98 | 0.86–1.11 | 0.73 | 4,374 | 40.0 | 1.09 | 1.02–1.16 | 0.01   |
|            | 30–40               |                   | 1,155 | 34.4 | 1.08 | 0.95–1.24 | 0.24 | 2,276 | 20.8 | 1.26 | 1.17–1.36 | <0.001 |
|            | >40                 |                   | 191   | 5.7  | 1.09 | 0.86–1.38 | 0.47 | 197   | 1.8  | 1.26 | 1.03–1.55 | 0.02   |
| rs8050136  | Obese ( $\geq 30$ ) |                   | 1,362 | 40.2 | 1.04 | 0.94–1.15 | 0.42 | 2,470 | 22.8 | 1.21 | 1.13–1.29 | <0.001 |
|            | <25                 |                   | 741   | 21.9 | †    |           |      | 4,050 | 37.3 | †    |           |        |
|            | 25–29               |                   | 1,282 | 37.9 | 1.02 | 0.89–1.16 | 0.80 | 4,337 | 40.0 | 1.10 | 1.03–1.17 | 0.01   |
|            | 30–40               |                   | 1,167 | 34.5 | 1.06 | 0.93–1.21 | 0.40 | 2,275 | 20.9 | 1.27 | 1.18–1.37 | <0.001 |
|            | >40                 |                   | 195   | 5.7  | 1.00 | 0.81–1.28 | 0.90 | 195   | 1.8  | 1.25 | 1.02–1.54 | 0.03   |
| rs1421085  | Obese ( $\geq 30$ ) |                   | 1,358 | 40.2 | 1.17 | 1.00–1.38 | 0.05 | 2,471 | 22.7 | 1.22 | 1.15–1.30 | <0.001 |
|            | <25                 |                   | 739   | 21.9 | †    |           |      | 4,059 | 37.3 | †    |           |        |
|            | 25–29               |                   | 1,285 | 38.0 | 1.02 | 0.83–1.26 | 0.83 | 4,352 | 40.0 | 1.10 | 1.03–1.17 | 0.01   |
|            | 30–40               |                   | 1,164 | 34.4 | 1.18 | 0.95–1.47 | 0.13 | 2,273 | 20.9 | 1.28 | 1.19–1.38 | <0.001 |
|            | >40                 |                   | 194   | 5.7  | 1.25 | 0.86–1.81 | 0.24 | 198   | 1.8  | 1.26 | 1.03–1.54 | 0.03   |

SNP, single nucleotide polymorphism; BMI, body mass index; AA, African-American; OR, odds ratio; CI, confidence interval; p, p-value for multivariable logistic regression (additive genetic model) used to predict risk of obesity (BMI  $\geq 30$  kg/m<sup>2</sup>), or for polytomous logistic regression used across categories of BMI with BMI <25 kg/m<sup>2</sup> as the common reference;

\*adjusted for age and gender in white participants, and for age, gender, and percentage European ancestry in African-American participants;

†, referent group.

doi:10.1371/journal.pone.0010521.t004

the effect sizes prior to adjustment were lower than that reported by Frayling et al. [7] for the Wellcome Trust Case Control Consortium but were similar to the results found for participants in the Finland-United States Investigation of the Non-Insulin-Dependent Diabetes Mellitus Genetics (FUSION) study in another early genome-wide association analysis of diabetes risk [15,19].

Genetic variants in the *FTO* gene have consistently been reported to be associated with BMI [4,5,6,7,8] and diabetes [7,15] in Europeans, but the results have been variable for replication in

other ethnicities including Hispanics [8,12,14], Asian and Oceanic populations [12,20,21,22,23,24,25,26,27,28,29,30,31], and African-Americans [8,11,12,13,14]. In a case-control study of *FTO* and childhood obesity defined as a BMI  $\geq 95^{\text{th}}$  percentile, only rs3751812 was shown to confer significant risk in African-American members of the cohort, while 7 out of the 13 SNPs genotyped were significantly associated with the same trait in Caucasians. As in the case of rs1421085 in the current study (Tables 1, 2, and S2), rs3751812 is not in strong LD in HapMap

**Table 5.** Association of *FTO* risk alleles and diabetes stratified by race.

| FTO SNP    | Race  | Subjects (n) | Diabetes (n) | %    | OR <sup>1</sup> | 95% CI    | p      | OR <sup>2</sup> | 95% CI    | p    |
|------------|-------|--------------|--------------|------|-----------------|-----------|--------|-----------------|-----------|------|
| rs9939609  | AA    | 3,340        | 655          | 19.6 | 0.92            | 0.82–1.04 | 0.18   | 0.91            | 0.80–1.03 | 0.12 |
|            | White | 10,903       | 988          | 9.1  | 1.19            | 1.09–1.31 | <0.001 | 1.12            | 1.02–1.23 | 0.02 |
| rs17817449 | AA    | 3,353        | 653          | 19.5 | 0.92            | 0.81–1.04 | 0.17   | 0.89            | 0.79–1.02 | 0.08 |
|            | White | 10,934       | 986          | 9.0  | 1.18            | 1.08–1.30 | <0.001 | 1.11            | 1.01–1.22 | 0.03 |
| rs8050136  | AA    | 3,385        | 657          | 19.4 | 0.94            | 0.83–1.06 | 0.34   | 0.94            | 0.83–1.06 | 0.29 |
|            | White | 10,882       | 984          | 9.1  | 1.19            | 1.08–1.31 | <0.001 | 1.12            | 1.01–1.23 | 0.02 |
| rs1421085  | AA    | 3,382        | 657          | 19.4 | 0.79            | 0.64–0.98 | 0.03   | 0.75            | 0.60–0.93 | 0.01 |
|            | White | 10,857       | 989          | 9.1  | 1.19            | 1.09–1.31 | <0.001 | 1.12            | 1.01–1.23 | 0.02 |

SNP, single nucleotide polymorphism; n, number; OR<sup>1</sup>, odds ratio, adjusted for age and gender in white participants, and for age, gender, and percentage European ancestry in African-American participants; CI, confidence interval; OR<sup>2</sup>, odds ratio, adjusted for age, gender, and BMI in white participants, and for age, gender, BMI, and percentage European ancestry in African-American participants; p, p-value for multivariable logistic regression (additive genetic model); AA, African-American.

doi:10.1371/journal.pone.0010521.t005

African ancestry populations with the *FTO* rs9939609 variant first identified in Europeans ( $r^2 = 0.072$  in Yoruba in Ibadan, Nigeria (YRI);  $r^2 = 0.119$  in African ancestry in southwest USA (ASW)), and the minor allele frequency (MAF) was not the same for white and African-American participants enrolled in the cohort (MAF for rs3751812 = 0.443 and 0.115 in Caucasian and African-Americans, respectively), indicating that this polymorphism may be associated differently with a putative causative variant in the two racial groups [11]. In contrast, when 27 *FTO* variants were genotyped in 604 African-American subjects enrolled in the Insulin Resistance Atherosclerosis Family Study, both rs9939609 and rs8050136 were significantly associated with BMI and WC, but no association was observed for either rs3751812 or rs1421085 [14]. Scuteri et al. carried out a genome-wide association scan in 6,148 individuals from a genetically isolated population in Sardinia and identified 8 SNPs within the *FTO* gene that were associated with increased BMI, hip circumference, and weight. When either the SNP that was most highly associated with all 3 quantitative traits in Sardinia (rs9930506) or 7 additional SNPs were genotyped in 1,101 African-American participants in the GenNet study, there was no evidence for association with BMI. The authors suggested that because the MAF for some of the *FTO* variants tested, including rs1421085, was lower in African-Americans than in European Americans, increased sample sizes would be required to assess their effects [8]. A similar difference in allele frequency was observed in the study reported here (MAF for rs1421085 = 0.41 and 0.11 in whites and African-Americans, respectively) while the study population examined was considerably larger ( $n = 3,450$  African-Americans), possibly enabling the detection of an association between this variant and an obesity-related quantitative trait in the ARIC cohort. There was also no association observed between 2 *FTO* polymorphisms (rs9939609 and rs8050136) and obesity, BMI, WC, or diabetes in African-American participants in a nested case-control study of postmenopausal women from the Women's Health Initiative-Observational Study [12], or between *FTO* variants and either BMI or weight in a genome-wide association study that included a group of 1,160 African-Americans in the discovery sample [13].

Evidence of statistical interaction between race and the *FTO* polymorphism shown after combining African-American and white participants further suggests that the influence of the *FTO* gene on diabetes susceptibility may be context dependent. There are a number of potential explanations for the difference in the impact of this gene on disease risk in white and African-American participants in the ARIC study where there was adequate power to detect an effect of the same magnitude ( $OR = 1.15$ – $1.27$ ) previously reported for Europeans [7,15,19] (Table S3). One factor may be the degree of LD between the polymorphisms since all of the *FTO* SNPs are highly correlated ( $r^2 > 0.90$ ) in whites of European descent (CEU) whereas the strength of LD across the 19.6-kb region within intron 1 is reduced in populations with African ancestry included in the International HapMap project [17] (Table S2). The contribution of all four of the SNPs to increased diabetes risk in whites is in accordance with the LD pattern in the region so that the analysis of each of the variants would be expected to yield a similar measure of association. In addition, the differences in LD among the SNPs when whites are compared to African-Americans could lead to the observed results if the true causative mutation is in turn correlated with the four *FTO* variants examined in whites but only with rs1421085 in African-Americans. Another possibility is that if the relationship between *FTO* sequence variation and diabetes is at least partially mediated by BMI, the nominally significant p-value found for the association of rs1421085 with obesity and the absence of

association for the remaining variants in African-Americans may make an increase in diabetes susceptibility more difficult to detect. Alternatively, although it is necessary to treat this speculation with considerable caution, the genetic architecture of diabetes may differ in the two ethnic groups. Detection of a protective effect of the rs1421085 C allele against diabetes in African-Americans while risk is increased in whites, even though the same allele marginally increases susceptibility to obesity in both racial groups, provides some support for this view. Finally, variation in other genetic or environmental factors that contribute to the development of type 2 diabetes may underlie the apparently disparate effects of the *FTO* gene in African-Americans and whites in the ARIC cohort. More extensive genotyping of common polymorphisms in other populations combined with genomic sequencing strategies to catalog the contribution of rare variants will be required to confirm the observed racial differences in the effect of the *FTO* SNPs on diabetes susceptibility, and may help to distinguish between these various possibilities.

## Materials and Methods

### Ethics Statement

All individuals enrolled in the ARIC study provided written informed consent, and the study design and methods were approved by institutional review boards at the four collaborating medical centers: University of Mississippi Medical Center Institutional Review Board (Jackson Field Center); Wake Forest University Health Sciences Institutional Review Board (Forsyth County Field Center); University of Minnesota Institutional Review Board (Minnesota Field Center); and the Johns Hopkins School of Public Health Institutional Review Board (Washington County Field Center).

### Atherosclerosis Risk in Communities (ARIC) Study

The ARIC Study is a prospective longitudinal investigation of the development of atherosclerosis and its clinical sequelae involving 15,792 individuals aged 45 to 64 years at baseline selected by probability sampling from four communities in the United States. A detailed description of the ARIC Study has been reported previously [16]. At the inception of the study in 1986–1989, the participants were recruited from Forsyth County, North Carolina; Jackson, Mississippi (African-Americans only); the northwestern suburbs of Minneapolis, Minnesota; or Washington County, Maryland. Four examinations have been carried out at three-year intervals (exam 1, 1987–1989; exam 2, 1990–1992; exam 3, 1993–1995; exam 4, 1996–1998), and subjects are contacted annually to update their medical histories between examinations. Individuals were excluded from this analysis if they restricted use of their DNA ( $n = 44$ ), were African-Americans from the Minnesota or Maryland field centers because of the small numbers of individuals recruited from these sites ( $n = 55$ ), were neither African-American nor white ( $n = 48$ ), or were missing all *FTO* genotypes ( $n = 599$ ), diabetes case status ( $n = 102$ ), BMI ( $n = 12$ ), WC ( $n = 3$ ), WHR ( $n = 4$ ), or estimated percentage European ancestry ( $n = 433$ ). The final study sample consisted of 14,492 participants.

### Clinical and Laboratory Measurements at the Baseline Examination

The prevalence of diabetes was determined at the baseline examination using a fasting glucose level  $\geq 126$  mg/dl, a nonfasting glucose level  $\geq 200$  mg/dl, and/or self-reported physician diagnosis or treatment for diabetes. Body weight and other anthropometric variables were measured by trained

technicians according to standardized protocols. BMI was calculated as weight in kilograms/(height in meters)<sup>2</sup> and obesity was defined as BMI  $\geq 30$ . WHR was calculated as waist girth in cm/hip girth in cm. Blood pressure was measured three times while seated using a random-zero sphygmomanometer and the last two measurements were averaged for analysis. Plasma total cholesterol was measured by an enzymatic method [32] and low density lipoprotein (LDL) cholesterol was calculated [33]. High density lipoprotein (HDL) cholesterol was measured after dextran-magnesium precipitation of non-HDL [34]. Fasting serum glucose was measured by a standard hexokinase method on a Coulter DACOS chemistry analyzer (Coulter Instruments, Fullerton, CA, USA) and the fasting serum insulin level was assessed by radioimmunoassay (<sup>125</sup>I Insulin Kit, Cambridge Medical Diagnostics, Billerica, MA, USA).

## Genotype Determination

Genotyping of the *FTO* polymorphisms was performed using the TaqMan assay (Applied Biosystems, Foster City, CA, USA). Sequences for primers and TaqMan probes are available upon request. Allele detection was performed using the ABI Prism 7700 Sequence Detection System (Applied Biosystems). The genotype call rate, or the percentage of samples to which a genotype was assigned, was determined prior to exclusion of individuals from the analysis and ranged from 94.4% for rs9939609 and rs8050136 to 94.7% for rs1781744. After the application of all exclusion criteria, the proportion of missing genotype data in the final study sample did not exceed 2.5% for any of the genetic variants. The genotyping success rate was also assessed by analyzing the concordance between genotypes for pairs of blind duplicates included with the DNA samples from the study participants. Kappa coefficients [35], an index of the percent agreement between measurements corrected for agreement occurring by chance, were calculated for each SNP and ranged from 0.97 to 0.98.

## Statistical Analysis

All statistical analyses were performed using Stata 9 software (StataCorp, College Station, TX, USA). Hardy-Weinberg equilibrium was tested using a  $\chi^2$  goodness-of-fit test for all individuals in each racial group. The proportions, means and standard deviations were calculated for established risk factors for diabetes for both the prevalent diabetes cases and for the comparison

groups. Multivariable logistic regression was used to evaluate the relationship between diabetes case status, the *FTO* alleles, and measures of obesity under an additive genetic model. Tests of interaction were conducted by including main effects for each *FTO* polymorphism and gender or race in the logistic regression models, and introducing a multiplicative two-way interaction term for gene by gender or gene by race. Prevalence odds ratios (OR) were adjusted for age and gender for white participants, and age, gender, and percentage European ancestry for African-American participants [36]. Percentage European ancestry was determined by performing a genome-wide admixture mapping scan using a panel of 1,350 ancestry informative markers and the Illumina BeadLab platform (Illumina, San Diego, CA, USA). Global ancestry was estimated using ANCESTRYMAP software [37]. General linear models were used to assess mean differences in BMI, WHR, and WC among *FTO* SNP genotypes. A p-value  $< 0.05$  was considered statistically significant. The results of all statistical analyses are reported separately by self-reported racial group.

## Supporting Information

**Table S1** Haplotype analysis stratified by race.

Found at: doi:10.1371/journal.pone.0010521.s001 (0.04 MB DOC)

**Table S2** Linkage disequilibrium (LD) between *FTO* SNPs in HapMap populations.

Found at: doi:10.1371/journal.pone.0010521.s002 (0.05 MB DOC)

**Table S3** Prevalence odds ratios for diabetes and obesity case status detectable at 80% power stratified by race.

Found at: doi:10.1371/journal.pone.0010521.s003 (0.03 MB DOC)

## Acknowledgments

The authors thank the staff and participants of the ARIC study for their important contributions.

## Author Contributions

Conceived and designed the experiments: JB WHLK JSP EB. Performed the experiments: JB. Analyzed the data: JB WHLK JSP EB. Wrote the paper: JB EB.

## References

- Haffner SM, Lehto S, Ronnemaa T, Pyorala K, Laakso M (1998) Mortality from coronary heart disease in subjects with type 2 diabetes and in nondiabetic subjects with and without prior myocardial infarction. *N Engl J Med* 339: 229–234.
- Stern MP, Haffner SM (1986) Body fat distribution and hyperinsulinemia as risk factors for diabetes and cardiovascular disease. *Arteriosclerosis* 6: 123–130.
- Hamman RF, Wing RR, Edelstein SL, Lachin JM, Bray GA, et al. (2006) Effect of weight loss with lifestyle intervention on risk of diabetes. *Diabetes Care* 29: 2102–2107.
- Hunt SC, Stone S, Xin Y, Scherer CA, Magness CL, et al. (2008) Association of the *FTO* Gene With BMI. *Obesity (Silver Spring)* 16: 902–904.
- Hinney A, Nguyen TT, Scherag A, Friedel S, Bronner G, et al. (2007) Genome Wide Association (GWA) Study for Early Onset Extreme Obesity Supports the Role of Fat Mass and Obesity Associated Gene (*FTO*) Variants. *PLoS ONE* 2: e1361.
- Dina C, Meyre D, Gallina S, Durand E, Korner A, et al. (2007) Variation in *FTO* contributes to childhood obesity and severe adult obesity. *Nat Genet* 39: 724–726.
- Frayling TM, Timpson NJ, Weedon MN, Zeggini E, Freathy RM, et al. (2007) A common variant in the *FTO* gene is associated with body mass index and predisposes to childhood and adult obesity. *Science* 316: 889–894.
- Scuteri A, Sanna S, Chen WM, Uda M, Albai G, et al. (2007) Genome-Wide Association Scan Shows Genetic Variants in the *FTO* Gene Are Associated with Obesity-Related Traits. *PLoS Genet* 3: e115.
- Fischer J, Koch L, Emmerling C, Vierkotten J, Peters T, et al. (2009) Inactivation of the *Fto* gene protects from obesity. *Nature* 458: 894–898.
- Gerken T, Girard CA, Tung YC, Webby CJ, Saudek V, et al. (2007) The obesity-associated *FTO* gene encodes a 2-oxoglutarate-dependent nucleic acid demethylase. *Science* 318: 1469–1472.
- Grant SF, Li M, Bradfield JP, Kim CE, Annaiah K, et al. (2008) Association analysis of the *FTO* gene with obesity in children of Caucasian and African ancestry reveals a common tagging SNP. *PLoS ONE* 3: e1746.
- Song Y, You NC, Hsu YH, Howard BV, Langer RD, et al. (2008) *FTO* polymorphisms are associated with obesity but not diabetes risk in postmenopausal women. *Obesity (Silver Spring)* 16: 2472–2480.
- Thorleifsson G, Walters GB, Gudbjartsson DF, Steinthorsdottir V, Sulem P, et al. (2009) Genome-wide association yields new sequence variants at seven loci that associate with measures of obesity. *Nat Genet* 41: 18–24.
- Wing MR, Ziegler J, Langefeld CD, Ng MC, Haffner SM, et al. (2009) Analysis of *FTO* gene variants with measures of obesity and glucose homeostasis in the IRAS Family Study. *Hum Genet* 125: 615–626.
- Scott LJ, Mohlke KL, Bonnycastle LL, Willer CJ, Li Y, et al. (2007) A genome-wide association study of type 2 diabetes in Finns detects multiple susceptibility variants. *Science* 316: 1341–1345.
- (1989) The Atherosclerosis Risk in Communities (ARIC) Study: design and objectives. The ARIC investigators. *Am J Epidemiol* 129: 687–702.

17. Frazer KA, Ballinger DG, Cox DR, Hinds DA, Stuve LL, et al. (2007) A second generation human haplotype map of over 3.1 million SNPs. *Nature* 449: 851–861.
18. (1998) Clinical Guidelines on the Identification, Evaluation, and Treatment of Overweight and Obesity in Adults—The Evidence Report. National Institutes of Health. *Obes Res* 6 Suppl 2: 51S–209S.
19. Zeggini E, Weedon MN, Lindgren CM, Frayling TM, Elliott KS, et al. (2007) Replication of genome-wide association signals in UK samples reveals risk loci for type 2 diabetes. *Science* 316: 1336–1341.
20. Omori S, Tanaka Y, Takahashi A, Hirose H, Kashiwagi A, et al. (2008) Association of CDKAL1, IGF2BP2, CDKN2A/B, HHEX, SLC30A8, and KCNJ11 with susceptibility to type 2 diabetes in a Japanese population. *Diabetes* 57: 791–795.
21. Hotta K, Nakata Y, Matsuo T, Kamohara S, Kotani K, et al. (2008) Variations in the FTO gene are associated with severe obesity in the Japanese. *J Hum Genet* 53: 546–553.
22. Li H, Wu Y, Loos RJ, Hu FB, Liu Y, et al. (2008) Variants in the fat mass- and obesity-associated (FTO) gene are not associated with obesity in a Chinese Han population. *Diabetes* 57: 264–268.
23. Chang YC, Liu PH, Lee WJ, Chang TJ, Jiang YD, et al. (2008) Common variation in the fat mass and obesity-associated (FTO) gene confers risk of obesity and modulates BMI in the Chinese population. *Diabetes* 57: 2245–2252.
24. Tan JT, Dorajoo R, Scielstad M, Sim XL, Ong RT, et al. (2008) FTO variants are associated with obesity in the Chinese and Malay populations in Singapore. *Diabetes* 57: 2851–2857.
25. Hu C, Zhang R, Wang C, Wang J, Ma X, et al. (2009) PPARG, KCNJ11, CDKAL1, CDKN2A-CDKN2B, IDE-KIF11-HHEX, IGF2BP2 and SLC30A8 are associated with type 2 diabetes in a Chinese population. *PLoS One* 4: e7643.
26. Ng MC, Park KS, Oh B, Tam CH, Cho YM, et al. (2008) Implication of genetic variants near TCF7L2, SLC30A8, HHEX, CDKAL1, CDKN2A/B, IGF2BP2, and FTO in type 2 diabetes and obesity in 6,719 Asians. *Diabetes* 57: 2226–2233.
27. Cha SW, Choi SM, Kim KS, Park BL, Kim JR, et al. (2008) Replication of genetic effects of FTO polymorphisms on BMI in a Korean population. *Obesity (Silver Spring)* 16: 2187–2189.
28. Lee YH, Kang ES, Kim SH, Han SJ, Kim CH, et al. (2008) Association between polymorphisms in SLC30A8, HHEX, CDKN2A/B, IGF2BP2, FTO, WFS1, CDKAL1, KCNQ1 and type 2 diabetes in the Korean population. *J Hum Genet* 53: 991–998.
29. Yajnik CS, Janipalli CS, Bhaskar S, Kulkarni SR, Freathy RM, et al. (2009) FTO gene variants are strongly associated with type 2 diabetes in South Asian Indians. *Diabetologia* 52: 247–252.
30. Sanghera DK, Ortega L, Han S, Singh J, Ralhan SK, et al. (2008) Impact of nine common type 2 diabetes risk polymorphisms in Asian Indian Sikhs: PPARG2 (Pro12Ala), IGF2BP2, TCF7L2 and FTO variants confer a significant risk. *BMC Med Genet* 9: 59.
31. Ohashi J, Naka I, Kimura R, Natsuhara K, Yamauchi T, et al. (2007) FTO polymorphisms in oceanic populations. *J Hum Genet* 52: 1031–1035.
32. Siedel J, Hagele EO, Ziegenhorn J, Wahlefeld AW (1983) Reagent for the enzymatic determination of serum total cholesterol with improved lipolytic efficiency. *Clin Chem* 29: 1075–1080.
33. Friedewald WT, Levy RI, Fredrickson DS (1972) Estimation of the concentration of low-density lipoprotein cholesterol in plasma, without use of the preparative ultracentrifuge. *Clin Chem* 18: 499–502.
34. Warnick GR, Benderson J, Albers JJ (1982) Dextran sulfate-Mg<sup>2+</sup> precipitation procedure for quantitation of high-density-lipoprotein cholesterol. *Clin Chem* 28: 1379–1388.
35. Cohen J (1960) A coefficient of agreement for nominal scales. *Educ Psychol Meas* 20: 37–46.
36. Cheng CY, Kao WH, Patterson N, Tandon A, Haiman CA, et al. (2009) Admixture mapping of 15,280 African Americans identifies obesity susceptibility Loci on chromosomes 5 and X. *PLoS Genet* 5: e1000490.
37. Patterson N, Hattangadi N, Lane B, Lohmueller KE, Hafler DA, et al. (2004) Methods for high-density admixture mapping of disease genes. *Am J Hum Genet* 74: 979–1000.
